# Supplementary material
Source: PubMed Central journal article supplement (PMC5125725)
Supplement: NIHMS819367-supplement-supplement_1.pdf [file NIHMS819367-supplement-supplement_1.pdf]

TABLE E1. Pre-procedural patient characteristics, stratified by aortic root procedure

| Characteristic                                          | Composite graft                 |                         |                       |                         |                         |                         |                        |                         | P value |
|---------------------------------------------------------|---------------------------------|-------------------------|-----------------------|-------------------------|-------------------------|-------------------------|------------------------|-------------------------|---------|
|                                                         | Valve preservation<br>(n = 261) |                         | Biologic<br>(n = 297) |                         | Mechanical<br>(n = 156) |                         | Allograft<br>(n = 243) |                         |         |
|                                                         | n*                              | No. (%) or<br>mean ± SD | n*                    | No. (%) or<br>mean ± SD | n*                      | No. (%) or<br>mean ± SD | n*                     | No. (%) or<br>mean ± SD |         |
| Demographics                                            |                                 |                         |                       |                         |                         |                         |                        |                         |         |
| Age (y)                                                 | 261                             | 48 ± 14                 | 297                   | 66 ± 11                 | 156                     | 47 ± 11                 | 243                    | 53 ± 14                 | <.0001  |
| Male                                                    | 261                             | 208 (80)                | 297                   | 242 (81)                | 156                     | 132 (85)                | 243                    | 187 (77)                | .16     |
| Height (cm)                                             | 261                             | 181 ± 10                | 297                   | 176 ± 9.9               | 156                     | 179 ± 9.6               | 243                    | 175 ± 10                | <.0001  |
| Body mass index (kg/m <sup>2</sup> )                    | 236                             | 28 ± 5.6                | 271                   | 28 ± 4.9                | 143                     | 29 ± 5.7                | 205                    | 28 ± 4.9                | .3      |
| NYHA functional class                                   | 261                             |                         | 297                   |                         | 156                     |                         | 243                    |                         | <.0001  |
| I                                                       |                                 | 142 (54)                |                       | 133 (45)                |                         | 69 (44)                 |                        | 64 (26)                 |         |
| II                                                      |                                 | 95 (36)                 |                       | 116 (39)                |                         | 68 (44)                 |                        | 143 (59)                |         |
| III                                                     |                                 | 23 (8.8)                |                       | 38 (13)                 |                         | 17 (11)                 |                        | 28 (12)                 |         |
| IV                                                      |                                 | 1 (0.38)                |                       | 10 (3.4)                |                         | 2 (1.3)                 |                        | 8 (3.3)                 |         |
| Aorta and aortic valve                                  |                                 |                         |                       |                         |                         |                         |                        |                         |         |
| Aorta dimensions (cm)                                   |                                 |                         |                       |                         |                         |                         |                        |                         |         |
| Sinus of Valsalva diameter†                             | 216                             | 4.7 ± 0.67              | 207                   | 4.7 ± 0.80              | 102                     | 4.7 ± 1.0               | 111                    | 4.4 ± 0.95              | .0009   |
| Mid-ascending diameter†                                 | 237                             | 4.2 ± 0.99              | 266                   | 4.4 ± 0.94              | 125                     | 4.5 ± 1.2               | 207                    | 3.9 ± 0.86              | <.0001  |
| Aortic valve                                            |                                 |                         |                       |                         |                         |                         |                        |                         |         |
| Morphology                                              |                                 |                         |                       |                         |                         |                         |                        |                         |         |
| Unicuspid                                               | 248                             | 0 (0)                   | 296                   | 4 (1.4)                 | 155                     | 11 (7.1)                | 243                    | 3 (1.2)                 | <.0001  |
| Bicuspid                                                | 248                             | 26 (10)                 | 296                   | 72 (24)                 | 155                     | 45 (29)                 | 243                    | 30 (12)                 | <.0001  |
| Tricuspid                                               | 248                             | 222 (90)                | 296                   | 219 (74)                | 155                     | 99 (64)                 | 243                    | 210 (86)                | <.0001  |
| Quadricuspid                                            | 248                             | 0 (0)                   | 296                   | 1 (0.34)                | 155                     | 0 (0)                   | 243                    | 0 (0)                   | .5      |
| Pathology                                               |                                 |                         |                       |                         |                         |                         |                        |                         |         |
| Aortic root dilatation from ascending aortic aneurysm   | 261                             | 250 (96)                | 297                   | 162 (55)                | 156                     | 108 (69)                | 243                    | 117 (48)                | <.0001  |
| Degenerative                                            | 261                             | 9 (3.4)                 | 297                   | 126 (42)                | 156                     | 45 (29)                 | 243                    | 112 (46)                | <.0001  |
| Hemodynamics                                            |                                 |                         |                       |                         |                         |                         |                        |                         |         |
| Mean gradient (mm Hg)                                   | 101                             | 9.1 ± 7.3               | 189                   | 20 ± 14                 | 93                      | 21 ± 15                 | 177                    | 27 ± 20                 | <.0001  |
| Peak gradient (mm Hg)                                   | 105                             | 17 ± 11                 | 191                   | 35 ± 23                 | 93                      | 37 ± 25                 | 178                    | 48 ± 36                 | <.0001  |
| Pathophysiology                                         |                                 |                         |                       |                         |                         |                         |                        |                         |         |
| Stenosis                                                | 261                             | 2 (0.77)                | 297                   | 66 (22)                 | 156                     | 27 (17)                 | 243                    | 103 (42)                | <.0001  |
| Regurgitation                                           | 261                             | 180 (69)                | 297                   | 261 (88)                | 156                     | 141 (90)                | 243                    | 201 (83)                | <.0001  |
| Regurgitation grade                                     | 260                             |                         | 296                   |                         | 156                     |                         | 243                    |                         | <.0001  |
| 0                                                       |                                 | 81 (31)                 |                       | 35 (12)                 |                         | 15 (9.6)                |                        | 42 (17)                 |         |
| ≥1                                                      |                                 | 31 (12)                 |                       | 21 (7.1)                |                         | 6 (3.8)                 |                        | 19 (7.8)                |         |
| ≥2                                                      |                                 | 60 (23)                 |                       | 48 (16)                 |                         | 26 (17)                 |                        | 37 (15)                 |         |
| ≥3                                                      |                                 | 54 (21)                 |                       | 83 (28)                 |                         | 51 (33)                 |                        | 62 (26)                 |         |
| ≥4                                                      |                                 | 34 (13)                 |                       | 109 (37)                |                         | 58 (37)                 |                        | 83 (34)                 |         |
| Cardiac comorbidities                                   |                                 |                         |                       |                         |                         |                         |                        |                         |         |
| Mitral valve regurgitation                              | 261                             | 68 (26)                 | 297                   | 104 (35)                | 156                     | 44 (28)                 | 243                    | 73 (30)                 | .13     |
| Tricuspid valve regurgitation                           | 261                             | 48 (18)                 | 297                   | 74 (25)                 | 156                     | 30 (19)                 | 243                    | 44 (18)                 | .15     |
| Left ventricular ejection fraction (%)                  | 245                             | 55 ± 6.1                | 280                   | 52 ± 8.8                | 132                     | 53 ± 7.5                | 225                    | 52 ± 9.8                | .0006   |
| Left ventricular mass index (g/m <sup>2</sup> )         | 219                             | 119 ± 38                | 246                   | 150 ± 54                | 116                     | 143 ± 48                | 178                    | 146 ± 44                | <.0001  |
| Left atrial diameter (cm)                               | 221                             | 3.9 ± 0.76              | 254                   | 4.1 ± 0.80              | 117                     | 4.0 ± 0.74              | 200                    | 4.0 ± 0.75              | .05     |
| Right ventricular estimated systolic pressure (mm Hg)   | 173                             | 34 ± 6.6                | 211                   | 37 ± 9.9                | 76                      | 35 ± 8.9                | 150                    | 37 ± 8.8                | .0001   |
| No. of diseased coronary artery systems (≥50% stenosis) | 229                             |                         | 269                   |                         | 120                     |                         | 155                    |                         | <.0001  |
| 0                                                       |                                 | 202 (88)                |                       | 183 (68)                |                         | 102 (85)                |                        | 111 (72)                |         |
| 1                                                       |                                 | 15 (6.6)                |                       | 42 (16)                 |                         | 11 (9.2)                |                        | 26 (17)                 |         |
| 2                                                       |                                 | 9 (3.9)                 |                       | 25 (9.3)                |                         | 3 (2.5)                 |                        | 12 (7.7)                |         |
| 3                                                       |                                 | 3 (1.3)                 |                       | 19 (7.1)                |                         | 4 (3.3)                 |                        | 6 (3.9)                 |         |

(Continued)

TABLE E1. Continued

| Characteristic                                  | Composite graft                 |                         |                       |                         |                         |                         |                        |                         |            |
|-------------------------------------------------|---------------------------------|-------------------------|-----------------------|-------------------------|-------------------------|-------------------------|------------------------|-------------------------|------------|
|                                                 | Valve preservation<br>(n = 261) |                         | Biologic<br>(n = 297) |                         | Mechanical<br>(n = 156) |                         | Allograft<br>(n = 243) |                         | P<br>value |
|                                                 | n*                              | No. (%) or<br>mean ± SD | n*                    | No. (%) or<br>mean ± SD | n*                      | No. (%) or<br>mean ± SD | n*                     | No. (%) or<br>mean ± SD |            |
| Atrial fibrillation or flutter                  | 235                             | 4 (1.7)                 | 270                   | 25 (9.3)                | 142                     | 5 (3.5)                 | 205                    | 7 (3.4)                 | .0004      |
| Complete heart block or pacer                   | 235                             | 2 (0.85)                | 270                   | 3 (1.1)                 | 142                     | 3 (2.1)                 | 205                    | 3 (1.5)                 | .8         |
| Ventricular arrhythmia                          | 235                             | 12 (5.1)                | 270                   | 16 (5.9)                | 142                     | 7 (4.9)                 | 205                    | 16 (7.8)                | .6         |
| Heart failure                                   | 261                             | 13 (5.0)                | 297                   | 52 (18)                 | 156                     | 16 (10)                 | 243                    | 37 (15)                 | <.0001     |
| Noncardiac comorbidities                        |                                 |                         |                       |                         |                         |                         |                        |                         |            |
| Peripheral arterial disease                     | 261                             | 2 (0.77)                | 297                   | 17 (5.7)                | 156                     | 2 (1.3)                 | 243                    | 6 (2.5)                 | .002       |
| Carotid disease                                 | 261                             | 35 (13)                 | 297                   | 66 (22)                 | 156                     | 13 (8.3)                | 243                    | 26 (11)                 | <.0001     |
| Stroke                                          | 261                             | 9 (3.4)                 | 297                   | 16 (5.4)                | 156                     | 4 (2.6)                 | 243                    | 3 (1.2)                 | .06        |
| Hypertension                                    | 261                             | 152 (58)                | 297                   | 208 (70)                | 156                     | 81 (52)                 | 243                    | 127 (52)                | <.0001     |
| Diabetes mellitus,<br>pharmacologically treated | 258                             | 6 (2.3)                 | 295                   | 17 (5.8)                | 155                     | 8 (5.2)                 | 240                    | 9 (3.8)                 | .2         |
| COPD                                            | 261                             | 27 (10)                 | 297                   | 33 (11)                 | 156                     | 7 (4.5)                 | 243                    | 20 (8.2)                | .10        |
| History of smoking                              | 259                             | 116 (45)                | 294                   | 157 (53)                | 156                     | 62 (40)                 | 240                    | 116 (48)                | .03        |
| Creatinine (mg/dL)                              | 261                             | 0.95 ± 0.20             | 294                   | 1.0 ± 0.29              | 156                     | 0.99 ± 0.23             | 242                    | 1.0 ± 0.62              | .001       |
| Blood urea nitrogen (mg/dL)                     | 261                             | 16 ± 4.5                | 294                   | 19 ± 6.4                | 155                     | 16 ± 5.4                | 242                    | 17 ± 6.3                | <.0001     |
| Bilirubin (mg/dL)                               | 257                             | 0.68 ± 0.36             | 281                   | 0.77 ± 0.41             | 148                     | 0.75 ± 0.42             | 221                    | 0.77 ± 0.45             | .002       |
| Total cholesterol (mg/dL)                       | 202                             | 184 ± 34                | 234                   | 183 ± 35                | 124                     | 189 ± 43                | 170                    | 189 ± 40                | .4         |
| Triglycerides (mg/dL)                           | 201                             | 150 ± 99                | 235                   | 123 ± 72                | 124                     | 160 ± 125               | 169                    | 144 ± 126               | .0007      |
| Hematocrit (%)                                  | 254                             | 42 ± 4.9                | 282                   | 41 ± 5.3                | 150                     | 42 ± 4.8                | 221                    | 40 ± 4.3                | .0001      |

SD, Standard deviation; NYHA, New York Heart Association; COPD, chronic obstructive pulmonary disease. \*Patients with data available. †These are internal echocardiographic sizes that are expected to be 2 to 3 mm smaller than true or computed tomography external diameters.

TABLE E2. Label valve size

| Valve size (mm) | Composite graft       |                         |                        |
|-----------------|-----------------------|-------------------------|------------------------|
|                 | Biologic<br>(n = 297) | Mechanical<br>(n = 156) | Allograft<br>(n = 243) |
|                 | No. (%)               | No. (%)                 | No. (%)                |
| 17              | —                     | —                       | 1 (0.43)               |
| 18              | —                     | —                       | —                      |
| 19              | 8 (2.7)               | 1 (0.64)                | 5 (2.1)                |
| 20              | —                     | —                       | 10 (4.3)               |
| 21              | 23 (7.7)              | 8 (5.1)                 | 65 (28)                |
| 22              | —                     | —                       | 68 (29)                |
| 23              | 57 (19)               | 23 (15)                 | 21 (8.9)               |
| 24              | —                     | —                       | 16 (6.8)               |
| 25              | 127 (43)              | 51 (33)                 | 17 (7.2)               |
| 26              | —                     | —                       | 11 (4.7)               |
| 27              | 68 (23)               | 44 (28)                 | 15 (6.4)               |
| 28              | —                     | 2 (1.3)                 | 3 (1.3)                |
| 29              | 14 (4.7)              | 21 (13)                 | 3 (1.3)                |
| 30              | —                     | —                       | —                      |
| 31              | —                     | 5 (3.2)                 | —                      |
| 32              | —                     | —                       | —                      |
| 33              | —                     | 1 (0.64)                | —                      |

TABLE E3. Propensity-score risk-adjusted comparison of time-related reoperation among aortic root procedure groups

| Factor                          | Coefficient ± SE | P value |
|---------------------------------|------------------|---------|
| Early hazard phase              |                  |         |
| Surgical strategy               |                  |         |
| Valve preservation vs allograft | 3.01 ± 1.2       | .02     |
| Composite graft                 |                  |         |
| Biologic vs allograft           | 2.2 ± 1.2        | .05     |
| Mechanical vs allograft         | 1.4 ± 1.2        | .3      |
| Late hazard phase               |                  |         |
| Surgical strategy               |                  |         |
| Valve preservation vs allograft | -2.3 ± 0.86      | .008    |
| Composite graft                 |                  |         |
| Biologic vs allograft           | -0.22 ± 0.63     | .7      |
| Mechanical vs allograft         | -2.7 ± 1.1       | .009    |

Three propensity scores were incorporated into each hazard phase for risk adjustment. This is the primary analysis for results presented in Table 4, which uses a different reference group. SE, Standard error.
